# Supplementary material for: Antigenicity and immune correlate assessment of seven Plasmodium falciparum antigens in a longitudinal infant cohort from northern Ghana
Source: PubMed Central journal article supplement (PMC6565625; doi:10.1038/s41598-019-45092-4), 2019-06-13
Supplement: 41598_2019_45092_MOESM1_ESM.pdf [file 41598_2019_45092_MOESM1_ESM.pdf]

**Antigenicity and immune correlate assessment of seven *Plasmodium falciparum* antigens in a longitudinal infant cohort from northern Ghana**

Kwadwo Asamoah Kusi<sup>1\*</sup>, Joao Aguiar<sup>2</sup>, Selassie Kumordjie<sup>1</sup>, Felix Aggor<sup>1#</sup>, Jessica Bolton<sup>2</sup>, Andrea Renner<sup>2&</sup>, Eric Kyei-Baafour<sup>1</sup>, Naiki Pupilampu<sup>3</sup>, Maria Belmonte<sup>2</sup>, Daniel Dodoo<sup>1</sup>, Ben Adu Gyan<sup>1</sup>, Michael Fokuo ofori<sup>1</sup>, Abraham Rex Oduro<sup>4</sup>, Frank Atuguba<sup>4</sup>, Kwadwo Ansah Koram<sup>5</sup>, Nehkonti Adams<sup>3^</sup>, Andrew Letizia<sup>3</sup>, Eileen Villasante<sup>2</sup>, Martha Sedegah<sup>2</sup>

**Supplementary Table S1: Median, 25th and 75th percentiles for time point specific antibody levels**

| Antibody   | Sampling time point | Median | 25 <sup>th</sup> percentile | 75 <sup>th</sup> percentile |
|------------|---------------------|--------|-----------------------------|-----------------------------|
| Anti-Pf02  | July. 2004          | 21.14  | 15.58                       | 34.11                       |
|            | Sept. 2004          | 26     | 15.23                       | 34.38                       |
|            | Nov. 2004           | 24.27  | 14.23                       | 42.49                       |
|            | Jan. 2005           | 27.8   | 18.27                       | 43.79                       |
|            | March. 2005         | 28.99  | 17.24                       | 54.78                       |
|            | May. 2005           | 23.21  | 13.99                       | 36.95                       |
| Anti-Pf26  | July. 2004          | 56.13  | 31.21                       | 86.94                       |
|            | Sept. 2004          | 51.71  | 26.34                       | 71.47                       |
|            | Nov. 2004           | 46.88  | 22.81                       | 106.27                      |
|            | Jan. 2005           | 64.49  | 39.12                       | 82.53                       |
|            | March. 2005         | 54.85  | 38.93                       | 84.04                       |
|            | May. 2005           | 44.03  | 31.08                       | 63.26                       |
| Anti-Pf56  | July. 2004          | 39.43  | 24.49                       | 57.91                       |
|            | Sept. 2004          | 42.79  | 24.07                       | 53.93                       |
|            | Nov. 2004           | 47.78  | 29.31                       | 72.19                       |
|            | Jan. 2005           | 44.47  | 34.4                        | 99.2                        |
|            | March. 2005         | 53.63  | 35.19                       | 70.05                       |
|            | May. 2005           | 40.22  | 25.75                       | 55.7                        |
| Anti-Pf61  | July. 2004          | 47.74  | 23.15                       | 89.2                        |
|            | Sept. 2004          | 55.17  | 30.65                       | 79.92                       |
|            | Nov. 2004           | 58.76  | 28.77                       | 97.84                       |
|            | Jan. 2005           | 57.44  | 36.7                        | 103.07                      |
|            | March. 2005         | 68.18  | 29.46                       | 113.46                      |
|            | May. 2005           | 49.38  | 24.66                       | 83.5                        |
| Anti-Pf106 | July. 2004          | 38.03  | 19.23                       | 83.58                       |

|            |             |       |       |        |
|------------|-------------|-------|-------|--------|
|            | Sept. 2004  | 37.72 | 21.12 | 78.62  |
|            | Nov. 2004   | 46.12 | 17.58 | 87.24  |
|            | Jan. 2005   | 38.81 | 28.96 | 117.3  |
|            | March. 2005 | 39.36 | 25.65 | 91.42  |
|            | May. 2005   | 39.08 | 18.38 | 56.98  |
| Anti-Pf116 | July. 2004  | 54.29 | 30.8  | 136.22 |
|            | Sept. 2004  | 48.68 | 38.26 | 83.65  |
|            | Nov. 2004   | 67.44 | 37.24 | 111.85 |
|            | Jan. 2005   | 74.55 | 41.05 | 120.68 |
|            | March. 2005 | 85.91 | 37.77 | 142.85 |
|            | May. 2005   | 57.27 | 36.62 | 83.12  |
| Anti-Pf144 | July. 2004  | 23.15 | 14.98 | 40.22  |
|            | Sept. 2004  | 25.7  | 13.6  | 48.03  |
|            | Nov. 2004   | 22.22 | 13.53 | 54.19  |
|            | Jan. 2005   | 36.6  | 17.73 | 70.31  |
|            | March. 2005 | 38.92 | 17.31 | 94.05  |
|            | May. 2005   | 22.4  | 14.23 | 49.9   |

**Supplementary Table S2: Comparison of time point specific antibody levels between parasitaemic and non-parasitaemic children**

| Antibody  | Sampling time point | Parasitaemic |                             |                             | Non-parasitaemic |                             |                             | P value      |
|-----------|---------------------|--------------|-----------------------------|-----------------------------|------------------|-----------------------------|-----------------------------|--------------|
|           |                     | Median       | 25 <sup>th</sup> percentile | 75 <sup>th</sup> percentile | Median           | 25 <sup>th</sup> percentile | 75 <sup>th</sup> percentile |              |
| Anti-Pf02 | July. 2004          | 23.32        | 17.36                       | 34.52                       | 11.33            | 9.78                        | 13.33                       | <b>0.007</b> |
|           | Sept. 2004          | 27.04        | 16.16                       | 34.47                       | 16.93            | 10.88                       | 29.99                       | 0.39         |
|           | Nov. 2004           | 25.18        | 16.34                       | 50.65                       | 10.24            | 7.465                       | 23.425                      | 0.053        |
|           | Jan. 2005           | 29.07        | 20.61                       | 45.92                       | 14.17            | 9.29                        | 32.78                       | 0.068        |
|           | March. 2005         | 42.66        | 24.53                       | 57.74                       | 11.14            | 7.84                        | 21.05                       | <            |
|           | May. 2005           | 28.25        | 20.08                       | 39.32                       | 11.9             | 8.415                       | 26.26                       | <b>0.026</b> |
| Anti-Pf26 | July. 2004          | 48.37        | 30.45                       | 83.19                       | 69.92            | 50.7                        | 103.96                      | 0.52         |
|           | Sept. 2004          | 51.71        | 24.12                       | 69.83                       | 54.98            | 46.13                       | 63.83                       | 0.82         |
|           | Nov. 2004           | 66.99        | 25.81                       | 108.93                      | 19.25            | 17.51                       | 21                          | 0.16         |
|           | Jan. 2005           | 64.49        | 40.69                       | 80.64                       | 82.59            | 60.85                       | 104.33                      | 0.64         |
|           | March. 2005         | 79.07        | 50.61                       | 87.34                       | 43.38            | 29.2                        | 48.23                       | 0.06         |
|           | May. 2005           | 47.39        | 32.53                       | 61.8                        | 33.88            | 31.22                       | 73.27                       | 1            |
| Anti-Pf56 | July. 2004          | 41.41        | 22.4                        | 57.32                       | 30.84            | 27.39                       | 50.33                       | 0.93         |

|            |                |        |       |        |       |       |        |                              |
|------------|----------------|--------|-------|--------|-------|-------|--------|------------------------------|
|            | Sept. 2004     | 42.56  | 23.11 | 53.36  | 43.02 | 37.2  | 49.28  | 0.72                         |
|            | Nov. 2004      | 58.64  | 36.22 | 78.44  | 25.11 | 24.99 | 28.61  | 0.082                        |
|            | Jan. 2005      | 44.47  | 33.63 | 93.39  | 72.4  | 57.75 | 87.05  | 0.67                         |
|            | March.<br>2005 | 58.62  | 47.14 | 78.17  | 31.98 | 28.17 | 53.11  | 0.052                        |
|            | May. 2005      | 46.34  | 29.17 | 63     | 32.67 | 22.67 | 45.78  | 0.19                         |
|            | July. 2004     | 49.38  | 26.33 | 90.62  | 46.2  | 15.91 | 47.27  | 0.60                         |
|            | Sept. 2004     | 55.17  | 30.65 | 78.06  | 60.38 | 35.44 | 92.5   | 0.75                         |
|            | Nov. 2004      | 61.92  | 37.87 | 99.95  | 17.93 | 16.91 | 50.73  | 0.093                        |
| Anti-Pf61  | Jan. 2005      | 64.2   | 40.41 | 114.02 | 15.97 | 14.36 | 57.45  | <b>0.029</b>                 |
|            | March.<br>2005 | 89.03  | 53.79 | 121.76 | 19.27 | 13.11 | 53.95  | <b>&lt;</b><br><b>0.0001</b> |
|            | May. 2005      | 59.35  | 36.15 | 86.08  | 29    | 15.1  | 54.34  | 0.067                        |
|            | July. 2004     | 42.62  | 19.79 | 89.34  | 23.19 | 16.62 | 32.14  | 0.22                         |
|            | Sept. 2004     | 38.37  | 21.21 | 83.47  | 27.18 | 16.82 | 38.08  | 0.19                         |
|            | Nov. 2004      | 50.11  | 26.32 | 95.5   | 16.64 | 12.14 | 27.68  | 0.099                        |
| Anti-Pf106 | Jan. 2005      | 54.26  | 31.25 | 122.23 | 22.1  | 17.22 | 28.66  | <b>0.016</b>                 |
|            | March.<br>2005 | 59.23  | 30.61 | 96.05  | 21.03 | 12.91 | 32.21  | <b>0.0071</b>                |
|            | May. 2005      | 44.15  | 30.55 | 72.11  | 18.38 | 14.85 | 51.44  | <b>0.017</b>                 |
|            | July. 2004     | 55.59  | 43.66 | 147.78 | 28.09 | 24.5  | 51.62  | 0.19                         |
|            | Sept. 2004     | 48.77  | 38.26 | 102.47 | 42.16 | 41.33 | 42.99  | 0.67                         |
|            | Nov. 2004      | 74.57  | 47.12 | 107.47 | 32.49 | 26.89 | 116.09 | 0.32                         |
| Anti-Pf116 | Jan. 2005      | 83.35  | 53.93 | 130.55 | 28.64 | 26.68 | 48.02  | <b>0.019</b>                 |
|            | March.<br>2005 | 113.29 | 80.39 | 143.69 | 29.66 | 24.86 | 81.82  | <b>0.018</b>                 |
|            | May. 2005      | 62.89  | 52.75 | 83.69  | 35.92 | 27.57 | 61.48  | 0.053                        |
|            | July. 2004     | 27.61  | 13.56 | 40.45  | 21.56 | 18.45 | 23.09  | 0.93                         |
|            | Sept. 2004     | 26.41  | 14.95 | 50.6   | 13.55 | 9.575 | 24.795 | 0.25                         |
|            | Nov. 2004      | 27.74  | 17.08 | 63.45  | 7.72  | 7.56  | 19.09  | <b>0.03</b>                  |
| Anti-Pf144 | Jan. 2005      | 39.18  | 18.62 | 89.12  | 22.32 | 16.11 | 33.61  | 0.22                         |
|            | March.<br>2005 | 76.99  | 42.72 | 101.27 | 17.57 | 11.12 | 22.2   | <b>0.0009</b>                |
|            | May. 2005      | 36.38  | 18.58 | 53.94  | 19.71 | 13.27 | 31.11  | 0.13                         |

Footnotes:

P values from Mann-Whitney U tests
